# Supplementary material
Source: bioRxiv or medRxiv preprint supplement (https://www.biorxiv.org/highwire/filestream/25281/field_highwire_adjunct_files/2/089953-3.pdf)
Supplement: Supplementary file [file 089953-3.pdf]

| Replicate        | Short ID     | Culture date | Mycelial culture date | DNA extraction date | Sequence date | Sequence Plate | Mean IBS | Culture group | Rep Group |
|------------------|--------------|--------------|-----------------------|---------------------|---------------|----------------|----------|---------------|-----------|
| <b>A1 parent</b> |              |              |                       |                     |               |                |          |               |           |
| 1                | Pcap4777     | pre-7/2013   | pre-7/2013            | pre-7/2013          | 7/31/13       | C270BACXX_3    | 97.65%   | -             | -         |
| 2                | 664_1        | pre-9/2013   | pre-9/2013            | 9/30/13             | 5/27/14       | C4B1JACXX_8    | 98.22%   | -             | -         |
| 3                | 0664_1_T25   | 2/17/14      | pre-9/2014            | pre-9/2014          | 9/19/14       | C507CACXX_7    | 98.01%   | -             | -         |
| 4                | 0664_1_T26   | 4/7/14       | pre-9/2014            | pre-9/2014          | 9/19/14       | C507CACXX_7    | 97.72%   | -             | -         |
| 5                | 664_T29_1a   | 12/8/14      | 3/16/15               | 3/23/15             | 6/12/15       | C6H57ANXX_7    | 98.48%   | e             | e         |
| 6                | 664_T29_1b   | 12/8/14      | 3/16/15               | 3/23/15             | 6/12/15       | C6H57ANXX_7    | 98.44%   | e             | e         |
| 7                | 664_T29_2a   | 12/8/14      | 3/16/15               | 3/23/15             | 6/12/15       | C6H57ANXX_7    | 98.49%   | e             | f         |
| 8                | 664_T29_2b   | 12/8/14      | 3/16/15               | 3/23/15             | 6/12/15       | C6H57ANXX_7    | 98.44%   | e             | f         |
| 9                | 0664_T29_1   | 12/8/14      | 3/16/15               | 3/23/15             | 8/27/15       | C6P86ANXX_1    | 98.47%   | e             | -         |
| 10               | 0664_T29_2   | 12/8/14      | 3/16/15               | 3/23/15             | 8/27/15       | C6P86ANXX_1    | 98.44%   | e             | -         |
| 11               | 664_T29_1a   | 12/8/14      | 3/16/15               | 3/23/15             | 8/3/15        | C6RD8ANXX_1    | 98.35%   | e             | e         |
| 12               | 664_T29_1b   | 12/8/14      | 3/16/15               | 3/23/15             | 8/3/15        | C6RD8ANXX_1    | 98.25%   | e             | e         |
| 13               | 664_T29_2a   | 12/8/14      | 3/16/15               | 3/23/15             | 8/3/15        | C6RD8ANXX_1    | 98.18%   | e             | f         |
| 14               | 664_T29_2b   | 12/8/14      | 3/16/15               | 3/23/15             | 8/3/15        | C6RD8ANXX_1    | 98.19%   | e             | f         |
| <b>A2 parent</b> |              |              |                       |                     |               |                |          |               |           |
| 1                | Pcap4778     | pre-7/2013   | pre-7/2013            | pre-7/2013          | 7/31/13       | C270BACXX_3    | 97.92%   | -             | -         |
| 2                | 6180_4       | pre-9/2013   | pre-9/2013            | 9/30/13             | 5/27/14       | C4B1JACXX_8    | 97.99%   | -             | -         |
| 3                | 06180_4_T21  | pre-9/2013   | pre-9/2013            | 9/30/13             | 9/19/14       | C507CACXX_7    | 97.71%   | -             | -         |
| 4                | 6180_0217a   | 2/17/15      | 3/16/15               | 3/23/15             | 6/12/15       | C6H57ANXX_7    | 98.30%   | c             | d         |
| 5                | 6180_0217b   | 2/17/15      | 3/16/15               | 3/23/15             | 6/12/15       | C6H57ANXX_7    | 98.39%   | c             | d         |
| 6                | 6180_012815a | 1/28/15      | 3/16/15               | 3/23/15             | 6/12/15       | C6H57ANXX_7    | 98.39%   | d             | e         |
| -                | 6180_012815b | 1/28/15      | 3/16/15               | 3/23/15             | 6/12/15       | C6H57ANXX_7    | -        | -             | -         |
| 7                | 06180_128    | 1/28/15      | 3/16/15               | 3/23/15             | 8/27/15       | C6P86ANXX_1    | 98.09%   | d             | -         |
| 8                | 6180_0217a   | 2/17/15      | 3/16/15               | 3/23/15             | 8/3/15        | C6RD8ANXX_1    | 98.03%   | c             | d         |
| 9                | 6180_0217b   | 2/17/15      | 3/16/15               | 3/23/15             | 8/3/15        | C6RD8ANXX_1    | 98.24%   | c             | d         |
| 10               | 6180_012815a | 1/28/15      | 3/16/15               | 3/23/15             | 8/3/15        | C6RD8ANXX_1    | 98.24%   | d             | e         |
| 11               | 6180_012815b | 1/28/15      | 3/16/15               | 3/23/15             | 8/3/15        | C6RD8ANXX_1    | 98.12%   | d             | e         |

**Table S1.** Replicates of the parental isolates.

|                            | Sample              |              |       |              |                  |                  |
|----------------------------|---------------------|--------------|-------|--------------|------------------|------------------|
| Variables                  | 2009                | 2010         | 2011  | 2012         | 2013             | Total field      |
|                            | Not clone-corrected |              |       |              |                  |                  |
| MT                         |                     |              |       |              |                  |                  |
| A1                         | 14                  | 21           | 21    | 11           | 17*              | 84               |
| A2                         | 26                  | 34           | 32    | 24           | 31               | 147              |
| $\chi^2$ <i>P</i> -value** | <b>0.058</b>        | <b>0.080</b> | 0.131 | <b>0.028</b> | <b>&lt;0.001</b> | <b>&lt;0.001</b> |
| Total                      | 40                  | 55           | 53    | 35           | 48               | 231              |
|                            | Clone-corrected     |              |       |              |                  |                  |
| MT                         |                     |              |       |              |                  |                  |
| A1                         | 13                  | 16           | 18    | 9            | 9                | 65               |
| A2                         | 23                  | 23           | 27    | 7            | 14               | 94               |
| $\chi^2$ <i>P</i> -value** | <b>0.096</b>        | 0.262        | 0.180 | 0.617        | 0.297            | <b>0.021</b>     |
| Total                      | 36                  | 39           | 45    | 16           | 23               | 159              |
| Unique genotypes (%)       | 90.00               | 70.91        | 84.91 | 45.71        | 47.92            | 68.83            |

\*Excluding the isolate, 13PF\_29A, which exhibited a skewed allele depth ratio distribution.

\*\*Bold indicates significance ( $\alpha < 0.1$ )

**Table S2.** Counts of A1 and A2 mating types among non-clone-corrected and clone-corrected isolates with respect to year.

| Region | Scaffold | Minimum<br>Significant<br>Position (bp) | Maximum<br>Significant<br>Position (bp) | ROI size (bp) | Significant SNPs<br>(#) | Significant SNPs<br>in region (%) | Density of<br>Significant SNPs<br>(SNP/kb) | Linkage group |
|--------|----------|-----------------------------------------|-----------------------------------------|---------------|-------------------------|-----------------------------------|--------------------------------------------|---------------|
| R-8    | 8        | 341,231                                 | 1,121,521                               | 780,290       | 6                       | 5.22                              | 0.01                                       | 8             |
| R-19   | 19       | 704,365                                 | 888,453                                 | 184,088       | 23                      | 67.65                             | 0.12                                       | 16            |
| R-26   | 26       | 101,162                                 | 618,561                                 | 517,399       | 14                      | 16.28                             | 0.03                                       | 8             |
| R-33   | 33       | 54,561                                  | 181,690                                 | 127,129       | 17                      | 45.95                             | 0.13                                       | 16            |
| R-35   | 35       | 142,871                                 | 508,327                                 | 365,456       | 22                      | 31.88                             | 0.06                                       | 16            |
| R-55   | 55       | 85,182                                  | 383,472                                 | 298,290       | 29                      | 59.18                             | 0.1                                        | 16            |

**Table S3.** Regions of differentiation between field F<sub>1</sub> and *in vitro* F<sub>1</sub> isolates associated with incidence of Mendelian errors.

|                  | Genotype counts* |       |       |       |       |       |       |       |       |       |           | Haplotype counts*** |    |    |    |    |
|------------------|------------------|-------|-------|-------|-------|-------|-------|-------|-------|-------|-----------|---------------------|----|----|----|----|
|                  | H1/H2            | H3/H4 | H1/H3 | H1/H4 | H2/H3 | H2/H4 | H1/H1 | H2/H2 | H3/H3 | H4/H4 | Unknown** | H1                  | H2 | H3 | H4 |    |
| R-8 (sc8)        |                  |       |       |       |       |       |       |       |       |       |           |                     |    |    |    |    |
| Field F1         |                  |       | 27    | 25    | 18    | 22    | 1     | 1     | 1     |       | 9         | 54                  | 42 | 47 | 47 |    |
| Observed Parents | A1               |       |       |       |       |       | A2    |       |       |       |           | 1                   | 1  | 1  | 0  |    |
| in vitro F1      |                  |       | 12    | 6     | 15    | 4     | 1     | 3     |       |       |           |                     | 20 | 19 | 33 | 10 |
|                  |                  |       |       |       |       |       |       |       |       |       |           |                     |    |    |    |    |
| R-26 (sc26)      |                  |       |       |       |       |       |       |       |       |       |           |                     |    |    |    |    |
| Field F1         |                  |       | 15    | 24    | 27    | 32    | 2     |       | 1     |       | 3         | 39                  | 63 | 44 | 56 |    |
| Observed Parents | A1               |       |       |       |       |       | A2    |       |       |       |           | 1                   | 1  | 1  | 0  |    |
| in vitro F1      |                  |       | 13    | 5     | 14    | 5     | 1     | 3     |       |       |           |                     | 20 | 19 | 33 | 10 |
|                  |                  |       |       |       |       |       |       |       |       |       |           |                     |    |    |    |    |
| R-33 (sc33)      |                  |       |       |       |       |       |       |       |       |       |           |                     |    |    |    |    |
| Field F1         | 1                |       | 27    | 28    | 20    | 18    | 1     | 1     | 2     |       | 6         | 58                  | 41 | 51 | 46 |    |
| Observed Parents |                  | A2    |       |       |       |       | A1    |       |       |       |           | 1                   | 1  | 1  | 0  |    |
| in vitro F1      |                  |       | 13    | 23    | 0     | 1     | 3     | 1     |       |       |           |                     | 42 | 1  | 13 | 26 |
|                  |                  |       |       |       |       |       |       |       |       |       |           |                     |    |    |    |    |
| R-35 (sc35)      |                  |       |       |       |       |       |       |       |       |       |           |                     |    |    |    |    |
| Field F1         | 1                |       | 17    | 33    | 21    | 24    | 1     | 1     | 2     | 1     | 3         | 53                  | 48 | 42 | 59 |    |
| Observed Parents |                  |       |       |       |       |       | A1    | A2    |       |       |           | 1                   | 1  | 1  | 0  |    |
| in vitro F1      |                  |       | 19    | 12    | 0     | 0     | 5     | 2     |       |       | 3         | 41                  | 0  | 23 | 12 |    |
|                  |                  |       |       |       |       |       |       |       |       |       |           |                     |    |    |    |    |
| R-55 (sc55)      |                  |       |       |       |       |       |       |       |       |       |           |                     |    |    |    |    |
| Field F1         | 1                |       | 21    | 30    | 18    | 25    | 2     | 3     |       | 1     | 3         | 56                  | 44 | 45 | 57 |    |
| Observed Parents |                  | A2    |       |       |       |       | A1    |       |       |       |           | 1                   | 1  | 1  | 0  |    |
| in vitro F1      |                  |       | 23    | 11    | 0     | 0     | 5     | 2     |       |       |           |                     | 44 | 0  | 27 | 11 |

\*Outlined cells indicate the expected genotypes for the Field F1, *in vitro* F1, and parental isolates. Italic font and no outline indicate where observed data did not cohere with expectations.

\*\*Where the haplotype designation was unclear, i.e. due to recombination, the isolate was classified as Unknown. These isolates are indicated in S10 and S12 Figs for R-26 and R-35. Phasing also shown for R-33, but denoted haplotypes are for ROI-1, not R-33.

\*\*\*Haplotype counts do not necessarily sum to the sample size due to the Unknown isolates.

**Table S4.** Genotype and haplotype counts for regions of differentiation between the field F<sub>1</sub> and *in vitro* F<sub>1</sub>.

| Region | Scaffold | Minimum<br>Significant<br>Position (bp) | Maximum<br>Significant<br>Position (bp) | ROI size (bp) | Significant SNPs<br>(#) | Significant SNPs<br>in region (%) | Density of<br>Significant SNPs<br>(SNP/kb) | Linkage group |
|--------|----------|-----------------------------------------|-----------------------------------------|---------------|-------------------------|-----------------------------------|--------------------------------------------|---------------|
| -      | 7        | 422,903                                 | 1,260,693                               | 837,790       | 9                       | 7.09                              | 0.01                                       | 1 & 13        |
| -      | 18       | 720,911                                 | 895,992                                 | 175,081       | 3                       | 18.75                             | 0.02                                       | 2             |
| -      | 37       | 183,312                                 | 511,376                                 | 328,064       | 5                       | 6.58                              | 0.02                                       | 3             |
| -      | 6        | 58,320                                  | 945,375                                 | 887,055       | 20                      | 20.2                              | 0.02                                       | 4             |
| -      | 10       | 375,319                                 | 1,112,682                               | 737,363       | 7                       | 5.83                              | 0.01                                       | 5             |
| ROI-2  | 21       | 615,928                                 | 906,387                                 | 290,459       | 29                      | 67.44                             | 0.1                                        | 5             |
| -      | 24       | 401,564                                 | 662,972                                 | 261,408       | 9                       | 26.47                             | 0.03                                       | 5             |
| -      | 52       | 6,287                                   | 133,781                                 | 127,494       | 5                       | 20                                | 0.04                                       | 5             |
| -      | 63       | 66,589                                  | 303,371                                 | 236,782       | 7                       | 21.21                             | 0.03                                       | 5             |
| -      | 68       | 49,163                                  | 293,159                                 | 243,996       | 13                      | 28.89                             | 0.05                                       | 5             |
| -      | 8        | 1,204                                   | 1,107,380                               | 1,106,176     | 19                      | 12.67                             | 0.02                                       | 8             |
| -      | 22       | 515,495                                 | 704,555                                 | 189,060       | 8                       | 23.53                             | 0.04                                       | 8             |
| -      | 58       | 107,853                                 | 313,193                                 | 205,340       | 8                       | 16.33                             | 0.04                                       | 8             |
| -      | 62       | 181,179                                 | 212,989                                 | 31,810        | 3                       | 25                                | 0.09                                       | 8             |
| -      | 2        | 295,579                                 | 1,796,377                               | 1,500,798     | 15                      | 6.55                              | 0.01                                       | 10 & 13       |
| -      | 3        | 45,932                                  | 836,688                                 | 790,756       | 5                       | 3.76                              | 0.01                                       | 10 & 13       |
| -      | 34       | 320,234                                 | 405,897                                 | 85,663        | 9                       | 42.86                             | 0.11                                       | 10            |
| -      | 53       | 22,057                                  | 411,035                                 | 388,978       | 9                       | 15.79                             | 0.02                                       | 12            |
| -      | 36       | 112,937                                 | 484,604                                 | 371,667       | 13                      | 37.14                             | 0.03                                       | 13            |
| -      | 20       | 143,241                                 | 806,490                                 | 663,249       | 20                      | 15.5                              | 0.03                                       | 16            |
| ROI-1  | 33       | 47,384                                  | 560,094                                 | 512,710       | 52                      | 55.32                             | 0.1                                        | 16            |
| -      | 55       | 23,126                                  | 372,172                                 | 349,046       | 9                       | 16.07                             | 0.03                                       | 16            |

**Table S5.** Regions of differentiation between the field F<sub>1</sub> and inbred subpopulations.

|                  |      | Genotype counts* |       |       |       |       |       |           | Haplotype counts |     |     | Haplotype (%)*** |       |       |
|------------------|------|------------------|-------|-------|-------|-------|-------|-----------|------------------|-----|-----|------------------|-------|-------|
|                  |      | H1/H1            | H3/H4 | H1/H3 | H1/H4 | H3/H3 | H4/H4 | Unknown** | H1               | H3  | H4  | H1               | H3    | H4    |
| Observed Parents |      | A1               | A2    |       |       |       |       |           | 2.0              | 1.0 | 1.0 | 0.5              | 0.25  | 0.25  |
|                  |      |                  |       |       |       |       |       |           |                  |     |     |                  |       |       |
| Field F1         |      |                  |       |       |       |       |       |           |                  |     |     |                  |       |       |
|                  | 2009 | 2                |       | 15    | 15    | I     |       | 3         | 34               | 17  | 15  | 47.22            | 23.61 | 20.83 |
|                  | 2010 |                  |       | 20    | 19    |       |       |           | 39               | 20  | 19  | 50.00            | 25.64 | 24.36 |
|                  | 2011 | 1                |       | 15    | 12    | I     |       |           | 29               | 17  | 12  | 50.00            | 29.31 | 20.69 |
| Total            |      | 3                |       | 50    | 46    | 2     |       | 3         | 102              | 54  | 46  | 49.04            | 25.96 | 22.12 |
|                  |      |                  |       |       |       |       |       |           |                  |     |     |                  |       |       |
| Field inbred     |      |                  |       |       |       |       |       |           |                  |     |     |                  |       |       |
|                  | 2011 | 4                |       | 7     | 3     |       |       |           | 18               | 7   | 3   | 64.29            | 25.00 | 10.71 |
|                  | 2012 | 6                |       | 6     |       | 4     |       |           | 18               | 14  | 0   | 56.25            | 43.75 | 0.00  |
|                  | 2013 | 5                | 1     | 12    | 1     | 4     |       |           | 23               | 21  | 2   | 50.00            | 45.65 | 4.35  |
| Total            |      | 15               | 1     | 25    | 4     | 8     |       |           | 59               | 42  | 5   | 55.66            | 39.62 | 4.72  |

\*Outlined boxes denote the expected genotypes for the parents, Field F1 and Field inbred, assuming simple Mendelian inheritance.

\*\*Where haplotype was unclear, i.e. due to recombination between distinct haplotypes, the isolate was classified as Unknown. These isolates are indicated in S11 Fig.

\*\*\*Haplotype frequencies do not necessarily sum to one due to the Unknown genotypes.

**Table S6.** Genotype and haplotype counts in ROI-1 in the field population with respect to year and subpopulation (F<sub>1</sub> vs. inbred).

|                  |      | Genotype counts* |       |       |       |       |       |           | Haplotype counts |    |    | Haplotype (%)*** |       |       |
|------------------|------|------------------|-------|-------|-------|-------|-------|-----------|------------------|----|----|------------------|-------|-------|
|                  |      | H1/H1            | H3/H4 | H1/H3 | H1/H4 | H3/H3 | H4/H4 | Unknown** | H1               | H3 | H4 | H1               | H3    | H4    |
| Observed Parents |      | A1               | A2    |       |       |       |       |           | 2                | 1  | 1  | 0.5              | 0.25  | 0.25  |
|                  |      |                  |       |       |       |       |       |           |                  |    |    |                  |       |       |
| Field F1         |      |                  |       |       |       |       |       |           |                  |    |    |                  |       |       |
|                  | 2009 |                  |       | 21    | 15    |       |       |           | 36               | 21 | 15 | 50.00            | 29.17 | 20.83 |
|                  | 2010 |                  |       | 24    | 15    |       |       |           | 39               | 24 | 15 | 50.00            | 30.77 | 19.23 |
|                  | 2011 |                  |       | 21    | 8     |       |       |           | 29               | 21 | 8  | 50.00            | 36.21 | 13.79 |
| Total            |      |                  |       | 66    | 38    |       |       |           | 104              | 66 | 38 | 50.00            | 31.73 | 18.27 |
|                  |      |                  |       |       |       |       |       |           |                  |    |    |                  |       |       |
| Field inbred     |      |                  |       |       |       |       |       |           |                  |    |    |                  |       |       |
|                  | 2011 | 9                |       | 3     | 1     |       |       | 1         | 22               | 3  | 1  | 78.57            | 10.71 | 3.57  |
|                  | 2012 | 9                |       | 4     | 3     |       |       |           | 25               | 4  | 3  | 78.13            | 12.50 | 9.38  |
|                  | 2013 | 10               | 5     | 1     | 6     |       |       | 1         | 27               | 6  | 11 | 58.70            | 13.04 | 23.91 |
| Total            |      | 28               | 5     | 8     | 10    |       |       | 2         | 74               | 13 | 15 | 69.81            | 12.26 | 14.15 |

\*Outlined boxes denote the expected genotypes for the parents, Field F1 and Field inbred, assuming simple Mendelian inheritance.

\*\*Where haplotype was unclear, i.e. due to recombination between distinct haplotypes, the isolate was classified as Unknown.

\*\*\*Haplotype frequencies do not necessarily sum to one due to the Unknown genotypes.

**Table S7.** Genotype and haplotype counts in ROI-2 in the field population with respect to year and subpopulation (F<sub>1</sub> vs. inbred).

| Scaffold     | Minimum<br>Position (bp) | Maximum<br>Position (bp) | Size (bp) | Number of<br>SNPs in<br>region | Total SNPs<br>in scaffold |
|--------------|--------------------------|--------------------------|-----------|--------------------------------|---------------------------|
| Field F1     |                          |                          |           |                                |                           |
| 2            | 857,230                  | 1,027,986                | 170,756   | 17                             | 276                       |
| 4            | 78,389                   | 936,543                  | 858,154   | 69                             | 258                       |
| 27           | 1,260                    | 559,598                  | 558,338   | 80                             | 156                       |
| 34           | 373,020                  | 419,673                  | 46,653    | 14                             | 90                        |
| 40           | 53,533                   | 62,968                   | 9,435     | 4                              | 92                        |
| Field inbred |                          |                          |           |                                |                           |
| 4            | 204,373                  | 896,170                  | 691,797   | 53                             | 258                       |
| 27           | 8,102                    | 506,357                  | 498,255   | 20                             | 156                       |

**Table S8.** Regions of differentiation between isolates of opposite mating types in the field F<sub>1</sub> and inbred subpopulations.
